# Supplementary material for: Developmental windows of susceptibility to inorganic arsenic: a survey of current toxicologic and epidemiologic data
Source: Royal Society of Chemistry journal article supplement (doi:10.1039/c6tx00234j), 2016-01-01
Supplement: c6tx00234j1.xlsx [file c6tx00234j1.xlsx]

## Sheet: Supplemental Table 1
Supplemental Table 1. Select epidemiologic evidence linking prenatal and early life iAs exposure to human health outcomes
Timing of Exposure	Authors	Population	Arsenic Exposure Indicator	Arsenic Levels	Outcomes
Early Life	Dakeishi et al., 2006	Western Japan	Dried Milk Powder	4-7 mg/L iAs, corresponding to 450-610 μg/kg body weight per day	Death Acute symptoms (including fever, diarrhea, vomiting, cough, skin rash, abdominal distension, abnormal ECGs, hepatomegaly, erythrocyturia, etc.) Central nervous disorders (epilepsy, mental retardation, brain damage, lower IQ, higher proportion of people with an IQ < 85, hearing disabilities, etc.)
Prenatal	Farzan et al., 2013	New Hampshire, USA	Maternal Total Urinary Arsenic	Median, Mean (Range): 3.7 μg/L, 6.0 μg/L (0.45 - 58.3 μg/L)	Increased numbers of infant infections in the first four months of life treated with a prescription medication and lower respiratory infections treated with prescription medication. There was a non-significant association with the number of infections in the first four months of life requiring a doctor visit, the number of infections lasting more than two days, respiratory symptoms treated with a…
Prenatal and Early Life	Hamadani et al., 2011	Matlab, Bangladesh	Maternal and Children's Urine	Maternal (8th gestational week) Mean (10-90th Percentile): 81 μg/L (24-380 μg/L) Maternal (30 weeks gestation) Mean (10-90th percentile): 84 μg/L (26, 415 μg/L) Children's (1.5 years) Mean (10-90th Percentile): 34 μg/L (12-155 μg/L) Children's (5 years) Mean (10-90th Percentile): 51 μg/L (20-238 μg/L)	Females: Significant loss in Verbal IQ and Full Scale IQ in girls associated with arsenic measures in early gestation, late gestation, and at 5 years of age. Males: Similar, non-significant trends at all time points.
Prenatal	Kile et al., 2014	Bangaldesh	Drinking Water	Median (Range): 12 μg/L (<1 - 510 μg/L)	Exposure was significantly associated with DNA CpG methylation Exposure was also associated with an increase in CD4+ cells and a decrease in CD8+ T cells. There is a marginally significant decrease in B cells. Differential methylation was identified at CpG cites within 71 genes. These genes were enriched for the KEGG pathways: maturity onset diabetes of the young, hematopoietic cell lineage, and …
Prenatal	Laine et al., 2015	Gómez Palacio, Mexico	Maternal Total Urinary Arsenic	Urinary Median, Mean (Range) = 23.3 μg/L, 37.5 μg/L (4.3-319.7 μg/L)	Urinary iAs was negatively associated with mean gestational age and mean newborn length. Urinary MMAs were negatively associated with mean gestational age and birth weight. There was an estimated loss of 24.4 grams in birth weight for every percent increase in %MMAs. %MMAs was also negatively associated with placental weight, which was positively associated with %DMAs.
Prenatal	Rager et al., 2014	Gómez Palacio, Mexico	Maternal Total Urinary Arsenic	Median, Mean (Range) = 25.2 μg/L, 64.5 μg/L (6.2-319.7 μg/L)	12 miRNAs were positively associated with U-tAs and are involved in disease signaling, including cancer, reproductive system disease, connective tissue disorders, inflammatory disease, inflammatory response, organismal injury and abnormalities, respiratory disease, gastrointestinal disease, hepatic system disease, endocrine systme disorders, and metabolic disease. Of the 334 differentially expres…
Prenatal	Rojas et al., 2015	Gómez Palacio, Mexico	Maternal Total Urinary Arsenic	Urinary Mean, Median (Range) = 73.87 μg/L, 24.2 μg/L (6.2 - 319.7 μg/L)	2919 differentially methylated genes that corresponds to differential expression of 16 genes. 5 differentially expressed genes were associated with gestational age, 5 were associated with placental weight, and 1 was associated with head circumference
Prenatal and Early Life	Smith et al., 2012	Antofagasta, Chile	Drinking Water	~ 870 μg/L from 1958-1971	Increased mortality for bladder, laryngeal, lung, kidney, liver and other cancers, bronchiectasis, COPD, acute myocardial infarction, and chronic renal disease.
Early Life (Prenatal Possible)	Wasserman et al., 2014	Maine, USA	Drinking Water	Mean (SD) = 9.88 μg/L (15.06 μg/L)	Loss of 5-6 Full Scale IQ and index scores (Perceptual Reasoning, Working Memory, and Verbal Comprehension) in children drinking well water ≥ 5 μg/L compared to those with < 5 μg/L.

## Sheet: Supplemental Table 2
Supplemental Table 2. Select in vitro evidence linking prenatal and early life iAs exposure to human health outcomes
Timing of Exposure	Authors	Mouse Strain	Arsenic Exposure Indicator	Dose Range	Outcomes
Prenatal	Rodriguez et al., 2016	CD1	Drinking Water	0, 10 ppb, or 42.5 ppm	Earlier onsest of vaginal opening and increased body weight in exposure groups compared to controls. Vaginal opening was unrelated to weight gain in the 10 ppb group, but was in the 42.5 ppm group. Leuteinizing hormone was significantly increased in mice at 21 days following exposure to 10 ppb. There were significant differences between the 10 ppb and 42.5 ppm groups with respect to the total pup…
Prenatal, early life, and adulthood ("whole-life")	Tokar et al., 2011	CD1	Drinking Water	0, 6, 12, or 24 ppm NaAsO2	Males: Increase in hepatocellular carcinoma, lung adenocarcinoma, total gallbladder tumors, gallbladder hyperplasia, adrenal cortical adenoma, urinary bladder hyperplasia, and kidney hyperplasia. Females: Hepatocellular carcinomas, lung addenocarcinomas, adrenal cortical adenoma, urinary bladder hyperplasia, ovaria adenomas and carcinoma, uterine adenocarcinoma and hyperplasia, and oviduct hyperp…
Prenatal	Tokar et al., 2012	CD1	Drinking Water	0, 12.5 or 25 ppm MMAsIII	Males: Increase in heptocellular carcinoma, adrenal cortical adenomas, lung carcinoma, and rare testicular lesions. Females: Increase in uterine adenomas, total uterine tumors, ovarian adenoma, oviduct hyperplasia, adrenal cortical adenoma, and total epithelial ovarian tumors
Prenatal	Waalkes et al., 2004	C3H	Drinking Water	0, 42.5 and 85 ppm NaAsO2 (plus post-natal exposure to TPA).	Males: Increase in the number and multiplicity of hepatocellular tumors and adrenal adenomas. Increase in lung adenomcarcinoma following TPA exposure. Females: Increase in incidence and multiplicity of hepatocellular tumors (with TPA), epithelial ovarian tumors, lung adenocarcinoma (withTPA), and uterine proliferative lesions
Prenatal, early life, and adulthood ("whole-life")	Waalkes et al., 2014	CD1	Drinking Water	0, 50, 500, and 5000 ppb NaAsO2	Males: Increased incidence of bronchio-alveolar tumors in 50 and 500 ppb range. Females: Increased lung adenoma in the 50 ppb range.
Prenatal	Xie et al., 2007	C3H	Drinking Water	0 or 85 ppm NaAsO2	Decrease in methylation in GC rich regions Increased expression of glutathione system genes and metallothionein-1 Decreased expression of genes involved in methyl metabolism Disrupted CYP450 gene expression Increase expression of p57kip2 and decreased expression of the tumor suppressor p16
